# Supplementary material for: Variation in Carbon Content among the Major Tree Species in Hemiboreal Forests in Latvia
Source: MDPI journal article supplement (doi:10.3390/f12091292), 2021-09-21
Supplement: s1 [file s1]

**Supplementary material** to the article "Variation in carbon content among the major tree species in hemiboreal forests in Latvia".

Authors: Arta Bārdule\*, Jānis Liepiņš, Kaspars Liepiņš, Jeļena Stola, Aldis Butlers, Andis Lazdiņš

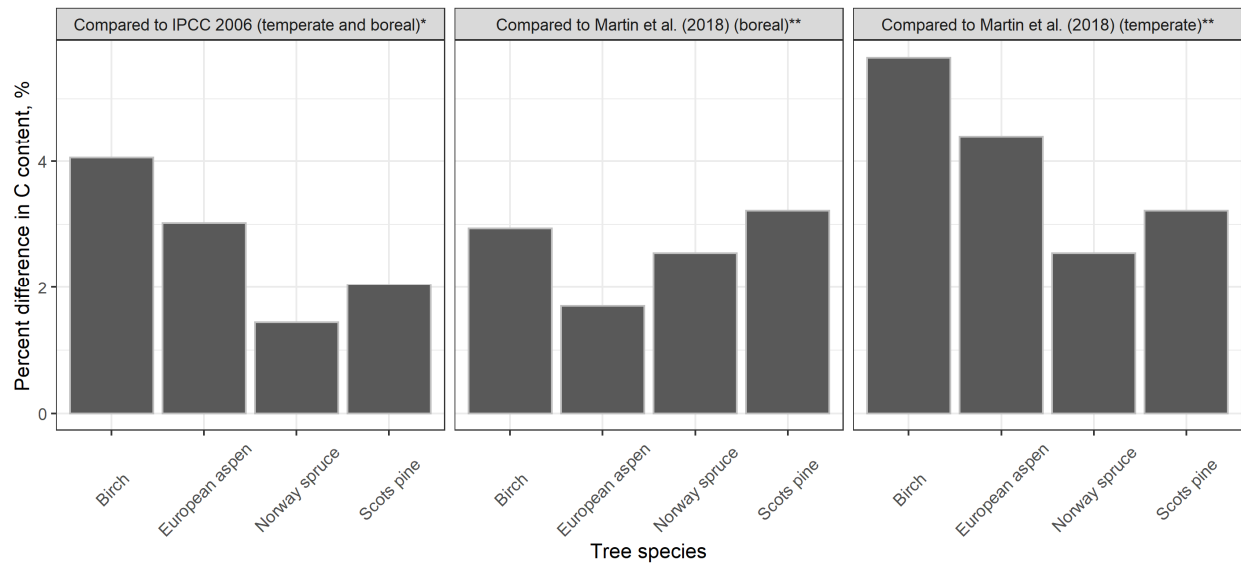

**Figure S1.** The difference in C content of different tree species between values as estimated in this study (weighted means) and IPCC 2006 values for temperate/boreal biomes or Martin et al. (2018) values for temperate and boreal biomes separately. \*Only C content values of aboveground tree parts are compared. \*\*C content values of the whole tree are compared.

## References

1. Martin, A.R.; Doraisami, M.; Thomas, S.C. Global patterns in wood carbon concentration across the world's trees and forests. *Nat. Geosci.* **2018**, *11*, 915–920.
2. IPCC 2006. *2006 IPCC Guidelines for national greenhouse gas Inventories*. In IPCC National Greenhouse Gas Inventories Programme; Eggleston, H.S., Buendia, L., Miwa, K., Ngara, T., Tanabe, K., Eds.; IGES: Kanagawa, Japan, 2006.
